# Supplementary material
Source: PubMed Central journal article supplement (PMC4018929)
Supplement: AEM.00324-14_zam999105343so1.pdf [file AEM.00324-14_zam999105343so1.pdf]

Figure S1

A

```
TanAS1 MKKTFISLLSATVILSGCGVGEHQNNNSNHDAKGVNTSNVKIKNYNQASSALQIDNSKWK 60
TanBLp -----MSNRLIFDADWLVPQVQVAG----- 21
      . * . * * . : . : * : : .

TanAS1 YDSKNNVYYQLNISYVSNPQAKNVEKLGIVPAAYFKGKKNHNGTYTVTNDKAKVNGYS 120
TanBLp --QAIQYYAARNIQYVQHP-VAAIQVLNVFVPAAYLHG-----SSVNGYQ 63
      . : * * * . * . : * : * * * * * : * . * * * .

TanAS1 ARTAPIVYPVNTPGYAEQSAPTSYRYSN-----ISKYMKAGFIYVEAGLRGRSMSGNN 174
TanBLp RATAPILMPNTVGGYLPGPADDPQRVTWPTNAGTIQQALKRGYVVVAAGIRGR----- 116
      * * * : * . . * * . * . * : * . : * * * : * * * * *

TanAS1 SSNASTKSYETGSPWGVTDLKAAIRYYRFNDSSLPGNSSKIYTFGHSGGGAQSAIAGASG 234
TanBLp TTVDKSGQRVGQAPAFIVDMKAAIRYVKYQGRLPGDANRIITNGTSAGGATSALAGASG 176
      : : . . : * : . * : * * * * * : : . * * * : * * * * * * * * * *

TanAS1 DSKLYYKYLEQIGAAMTDKNGKYISDKIDGAMAWCPITSLDQADAAYEQMGQYGNENGR 294
TanBLp NSAYFEPALTALGAAP-----ATDDIFAVSAYCPIHNLEHADMAYEQFNGIN---DW 226
      : * : * * * * * : * * . . * * * * * : * * * * * * * * * : . . :

TanAS1 KKNSFQQLSTDLASSYASYLNKLNKNGNTTSLTKSKNGQYTEGSYAKYLKKEIEDSA 354
TanBLp HRYQPVAGTTKNGRPFEPVSGQLTVEEQALSLALKAQFS-----TYLNQLKLTASDGT 280
      : : . : : . . . : * : : : * * * . . . : * : * * . * . :

TanAS1 TEFLNNTTFPYKQNSTEQAGMGNGGPGSGKPSGKMGSMQMRKQSSNKTYKTMDAYLKDL 414
TanBLp HLTLEAGMGSRDVRQLLISS-AQTAFDQGTDIHKYAGFAVTGNQVTDLDLSAYLKSL 339
      * * : : : . * : . . . . . : . . : . . : * : * * * * . *

TanAS1 NKKGTWITYDKKTKRAHITSLKDFAKYYKQPSKSVSAFDDLKRSQAENEVFGTSGSDSKL 474
TanBLp TR-----MKAVPAFDQLDLTSPENNLFGDATAKAKH 370
      . : * * * * * * . : . * * * * * : : : *

TanAS1 HFDQSLAKLLTENKSNYKLNKNGWNSNYVSSYKNDLTKTDKLGTSMSTRMNMYPMYLSD 534
TanBLp FTALAQTRSTVTAQLADAE-----IQAINPLSYLTT 402
      . : : : . : : * : : * * * * *

TanAS1 YYSGYGKSNVANHWIRIRTGIQQGDALNTE'TNLSLALKERVGSKNVDFKTVWDQGHMAE 594
TanBLp TSS-----QVAKHWRIRHGAADRDTSFALPIILAIMLEN--HGYGIDFALPWDIPHSGDY 455
      * : * * * * * * : * * : * : * : . . * * * * *

TanAS1 TSGNSDSNFIKWVESINKK 613
TanBLp DLG----DLFSWIDGLCQ- 469
      * : : . * : : : :
```

# B

TanA<sub>S1</sub> -MKKTFISLLS---ATVILSGCGVGEHQNNNSNHDAKGVN--TSNVKIKNYNQASSALQ 53  
TanA<sub>Lp</sub> MQFRKIVPLMSGLLVMSVGLAACGHSETKTKHPTSTVAKVAKATKQTVTKADVKNACKLL 60  
:.:.:\*:\* :\* \*:.\*\* .\* :.:.:. . \* \*:. . \* :.: . \*

TanA<sub>S1</sub> IDNSKWKYDSKNNVYQNLNISYVSNPQAKNVEKLGIIYVPAAYFKGKKNHNGTYTIVTVNDA 113  
TanA<sub>Lp</sub> INQKQWHYNATNKVYQVGVKYGKTKTSSTYESMGIFIPAKYVNAKASGQKTYTITFNNK 120  
\*.:.:\*:\*:.:.\*:\*\*\*\*:.\*:.\* :.:. :.. \*.:\*\*\*\*:\* \*:.\*. . : \*\*\*\*:.\*:\*

TanA<sub>S1</sub> KKVNGYSARTAPIVYPVNTPGYAEQSAPTSYRYSNISKYMKAGFIYVEAGLRGRSMSGN 173  
TanA<sub>Lp</sub> AKVKGYTAKTAPIVMPVNTPGYAAQTAPTGYDSS-ANKYTKAGFIYVAAGCRGLSQSDKS 179  
\*\*:\*:\*:\*:\*\*\*\*\* \*\*\*\*\* \*:\*:\*.\* \* .\*\* \*\*\*\*\* \*\* \*\* \* \* .

TanA<sub>S1</sub> NSSNASTKSYETGSPGWVTDLKA AIRYRFNDSSLPGNSSKIYTFGHSGGGAQSAIAGAS 233  
TanA<sub>Lp</sub> NGS-----SPGWVTDLKA AVRTLRLNRSRIAGNTNRVFTFGHSGGGAQSALMGAT 229  
\*.\* \*\*\*\*\*:\* \*:\* \* :.\*:.:.:\*\*\*\*\*: \*\*:

TanA<sub>S1</sub> GDSKLYYKYLEQIGAAMTDKNGKYISDKIDGAMAWCPITSLDQADAAYEWQMGQYGNEN 293  
TanA<sub>Lp</sub> GDSKYYTTLKAI GAPLATTTGKSTSDAVAGAMAWCPITSLDTANEAYEWNMGQYSNSGT 289  
\*\*\*\* \* .\*: \*\*:.: :..\* \*\* : \*\*\*\*\* \* : \*\*\*\*\*:\*\*\*.\*.\*.

TanA<sub>S1</sub> RKNFSFQKQLSTDLASSYASYLNKLNKNGN-TTSLTKSKNGQYTEGSYAKYLKKEIED 352  
TanA<sub>Lp</sub> RKQGTWTKALSNDMATS YAQYINKLGLKDANGKTLTLKSTSGIYTSGT YATYLLKKEVEQ 349  
\*\*.:.: \* \*\*.\*:\*\*\*.\*:\*\*\*\*.\*:\* .\*\*:\*.\*.\*.\* \*\*.\*:\*.\*\*\*\*\*:\*

TanA<sub>S1</sub> SATEFLNNTTFPYKQNSTEQAG-----MGNGGPSGGKPSG--KMGSMQMRKQS---- 399  
TanA<sub>Lp</sub> SLNNFLKDTTFPYKATSNEGPSGAASQTLTSGKMPSGSKPSGTAKSGSKPSGSAPSGTAT 409  
\* .:\*\*\*:\*\*\*\*\* .\*.\* .. .. \*\*\*.\*\*\* \* \*\* \* . \*

TanA<sub>S1</sub> ----SNKTYKTMDAYLKDNLNKKGTWITYDKKTKRAHITSLKDFAKYKQPSKSVSAFDD 454  
TanA<sub>Lp</sub> NSSSTSGETYKTATAYIKALNKNKWIYNAKKNATITSVKAFVKHCKTASKDVGAFDG 469  
\*.:\*\*\*\* \*\*:\* \*\*\*:\*.\*\*\*\*\*: \*.: \* \*\*:\* \*.\*: \* .\*\*.\*.\*\*\*.

TanA<sub>S1</sub> LKRSQAENEVFGTSGSDSKLHFDQSLAKLLTENKSNYKLNWNSNYVSSYKNDLTKTKDK 514  
TanA<sub>Lp</sub> LTRQQTENKLFATNGS-SANHFDA TISKLLTTNQSKYAKLKNYKASYAKAYRSDLKKTDA 528  
\*.\*.\*:\*:\*:.\*.\*.\* \* \*\*\* :.:\*\*\*\* \*.:\*\*\*\*:\*. :.:.\*.\*:\*.\*\*\*

TanA<sub>S1</sub> LGTSMSTRMNMYPMYLSDYYSYGKSNVANHWIRIRTG IQGD TALNTE TNLALSLKER 574  
TanA<sub>Lp</sub> QGSSIQKRMNLYNPLYLTSYDGYNTSKVAKYWRIRTG INQSD TALTVETNLALTLKQN 588  
\*.:.:.\*:\*\*\*\*:\*\*\*\*:.\*.\*.\*.\*.\*:\*\*\*\*:\*\*\*\*\*:\*.\*\*\*\*\*.\*\*\*\*\*:\*\*\*\*:.

TanA<sub>S1</sub> VGSKNVDFKTVWDQGHITMAETSGNSDSNFIKWVESINKK 613  
TanA<sub>Lp</sub> SQVKSVD FATVWGQGHTEAERKGNNETNFIKWVNKSLK- 626  
\*.\*.\* \*\*.\*.\*\*\* \*\* .\*\*.:\*\*\*\*\*: . \*

# C

```

TanAS1 -MKKTFISLLS----ATVILSGCGVGEHQNNNSNHDAKGVN--TSNVKIKNYNQASSALQ 53
TanALp MQFRKIVPLMSGLLVMSVGLAACGHSETKTKHPTSTVAKVAKATKQTVTKADVKNACKLL 60
TanBLp -----MSNRLIFDADWLVPEQVQ 18
      :.. . . . :

TanAS1 IDNSKWKYDSKNNVYQQLNISYVSNPQAKNVEKLGIIYVPAAYFKGKKNHNGTYTVTVND 113
TanALp INQKQWHYNATNKVYVQGVVKYGTKTTSSSTYESMGIFIPAKYVNAKASGQKTYTITFNNK 120
TanBLp VAGQAIQYYAAR-----NIQYVQHP-VAAIQVLNVFVPAAYLHG----- 56
      : . : * : . . : . * : . : : : : * * * . :

TanAS1 KKVNGYSARTAPIVYPVNTPGYAEQSAPTSYRYSN-----ISKYMKAGFIYVEAGLRGR 167
TanALp AKVKGYTAKTAPIVMPVNTPGYAAQTAPTGYDSS-----ANKYTKAGFIYVAAGCRGL 173
TanBLp SSVNGYQRATAPILMPNTVGGYLPGPADDPQRVTWPTNAGTIQQALKRGYVVAAGIRGR 116
      . * : * * * * : * . . * * : : * * : * * * *

TanAS1 SMSMGNSSNASTKSYETGSPWGVTDLKAARIYYRFNDSLPGNSSKIYTFGHSGGGAQS 227
TanALp SQSDKSNGS-----SPWGVTDLKAVRTLRLNRSRIAGNTNRVFTFGHSGGGAQS 223
TanBLp TTVDKSGQRVG-----QAPAFIVDMKAAIRYVKYNQGRLPGDANRIITNGTSAGGATS 169
      : . . : * : . * : * * * : * . : . * : : : * * * * *

TanAS1 AIAGASGDSKLYYKYLEQIGAAMTDKNGKYISDKIDGAMAWCPITSLDQADAAEYEQMGQ 287
TanALp ALMGATGDSKKYTTYLKAIGAPLATTGKSTSDAVAGAMAWCPITSLDTANEAYEWNMGQ 283
TanBLp ALAGASGNSAYFEPALTALGAAPAT-----DDIFAVSAYCPIHNLEHADMAYEQFNG 222
      * : * * : * * : * : * * . : * : . . * : * * * * . * : * : * * * * :

TanAS1 YGNEGNRKKNSFQKQLSTDLASSYASYLNKLNKNGN--TTLSTKSKNGQYTEGSYAKYL 346
TanALp YSNSGTRKQGTWTKALSNDMATSQAQYINKLGLKDANGKTLTLKSTSGIYTSGETYATYL 343
TanBLp INDWHRYQP-----VAGTTKNGRPFEPVSGQLTVEEQALSALKAQFSTYLNQL 272
      . : : : * : . * : . . : . * . : * . *

TanAS1 KKEIEDSATEFLNNTTFPYKQNSTEQAG-----MGNGGPSGGKPSG--KMGSMQMRK 397
TanALp KKEVEQSLNNFLKDTTFPYKATSNEGPSGAASQTLTSGKMPSGSKPSGTAKSGSKPSGSA 403
TanBLp KLTASDGTHTLNEAGMGSFRDVVRQLL----- 300
      * . . * : : : :

TanAS1 QS-----SNKTYKTMDAYLKDNLKKGWITYDKKTKRAHITSLKDFAKYKQPSKS 448
TanALp PSGTATNSSSTSGETYKTATAYIKALNKGKWIYNAKKNATITSVKAFVKHCKTASKD 463
TanBLp -----ISSAQTAFDQGTDIHKYAGFAVTGNQVTDLDSAYLKSLTR-MKA 344
      . : : : . . . : : . : . : . : * . *

TanAS1 VSAFDDLKRSQAENEVFGTSGSDSKLHFDQSLAKLLTENKSNYSKLNWNSNYVSSYKND 508
TanALp VGAFDGLTRQQTENKLFATNGS-SANHFDAITSKLLTTNQSKYAKLKNYKASYAKAYRSD 522
TanBLp VPAFDQLDLTSPENNLFGDATKAKHFTALAQTRSTVTAQLADAEL----- 390
      * * * * * . * : * * : . : : : . : : *

TanAS1 LTKTDKLGTSMSTRMNMYPMYLSDYYSYGYGKSNVANHWIRRTGIQQGDTALNTETNLS 568
TanALp LKKTDAGQSSIQKRMNLYNPLYLTSYDGYNTSKVAKYWRIRRTGINQSDTALTVETNLA 582
TanBLp -----IQAINPLSYLTTSS-----QVAKHWRIRHGAADRDTSAFPIILA 431
      : : * * : * * : . : * * : * * * * * : * * : * :

TanAS1 LALKERVGSKNVDFKTVWDQGHTEAETSNGSDSNFIKVVESINKK 613
TanALp LTLKQNSQVKSVDVFATVWGQGHTEAERKGNNETNFIKVVNKSJK- 626
TanBLp IMLENHG--YGIDFALPWDIPHSGDYDLG----DLFSWIDGLCQ- 469
      : * : . . : * * * * . * : * : * : : * : : :

```

Figure S2

ATCC14917 MQFRKIVPLMSGLLVMSVGLAACGHSETKTKHPTSTVAKVAKATKQTVTKADVKNACKLL 60  
RM35 MQFRKIVPLMSGLLVMSVGLAACGHSETKTKHPTSTVAKVAKATKQTVTKADVKNACKLL 60  
CECT749 MQFRKIVPLMSGLLVMSVGLAACGHSETKTKHPTSTVAKVAKATKQTVTKADVKNACKLL 60  
NC8 MQFRKIVPLMSGLLVMSVGLAACGHSETKTKHPTSTVAKVAKATKQTVTKADVKNACKLL 60  
\*\*\*\*\*

ATCC14917 INQKQWHYNATNKVYYQVGKYGTKTTSSTYESMGIFIPAKYVNAKASGQKTYTITFNNK 120  
RM35 INQKQWHYNATNKVYYQVGKYGTKTTSSTYESMGIFIPAKYVNAKASGQKTYTITFNNK 120  
CECT749 INQKQWHYNATNKVYYQVGKYGTKTTSSTYESMGIFIPAKYVNAKASGQKTYTITFNNK 120  
NC8 INQKQWHYNATNKVYYQVGKYGTKTTSSTYESMGIFIPAKYVNAKASGQKTYTITFNNK 120  
\*\*\*\*\*

ATCC14917 AKVKGYTAKTAPIVMPVNTPGYAAQTAPTGYDSSANKYTKAGFIYVAAGCRGLSQSDKSN 180  
RM35 AKVKGYTAKTAPIVMPVNTPGYAAQTAPTGYDSSANKYTKAGFIYVAAGCRGLSQSDKSN 180  
CECT749 AKVKGYTAKTAPIVMPVNTPGYAAQTAPTGYDSSANKYTKAGFIYVAAGCRGLSQSDKSN 180  
NC8 AKVKGYTAKTAPIVMPVNTPGYAAQTAPTGYDSSANKYTKAGFIYVAAGCRGLSQSDKSN 180  
\*\*\*\*\*

ATCC14917 GSSPWGVTDLKAAVRTLRLNRSRIAGNTNRVFTFGHSGGGAQSALMGATGDSKKYTTYLK 240  
RM35 GSSPWGVTDLKAAVRTLRLNRSRIAGNTNRVFTFGHSGGGAQSALMGATGDSKKYTTYLK 240  
CECT749 GSSPWGVTDLKAAVRTLRLNRSRIAGNTNRVFTFGHSGGGAQSALMGATGDSKKYTTYLK 240  
NC8 GSSPWGVTDLKAAVRTLRLNRSRIAGNTNRVFTFGHSGGGAQSALMGATGDSKKYTTYLK 240  
\*\*\*\*\*

ATCC14917 AIGAPLATTGKSTSDAVAGAMAWCPIITSLDTANEAYEWNMGQYNSGTRKQGTWTKALS 300  
RM35 AIGAPLATTGKSTSDAVAGAMAWCPIITSLDTANEAYEWNMGQYNSGTRKQGTWTKALS 300  
CECT749 AIGAPLATTGKSTSDAVAGAMAWCPIITSLDTANEAYEWNMGQYNSGTRKQGTWTKALS 300  
NC8 AIGAPLATTGKSTSDAVAGAMAWCPIITSLDTANEAYEWNMGQYNSGTRKQGTWTKALS 300  
\*\*\*\*\*

ATCC14917 NDMATSYAQYINKLGLKDANGKTLTLKKSTSGIYTSPTYATYLLKKEVEQSLNLFKDTTF 360  
RM35 NDMATSYAQYINKLGLKDANGKTLTLKKSTSGIYTSPTYATYLLKKEVEQSLNLFKDTTF 360  
CECT749 NDMATSYAQYINKLGLKDANGKTLTLKKSTSGIYTSPTYATYLLKKEVEQSLNLFKDTTF 360  
NC8 NDMATSYAQYINKLGLKDANGKTLTLKKSTSGIYTSPTYATYLLKKEVEQSLNLFKDTTF 360  
\*\*\*\*\*

ATCC14917 PYKATSNEGPSGAASQTLTSGKMPSGSKPSGTAKSGSKPSGSAPSGTATNSSSTSGETYK 420  
RM35 PYKATSNEGPSGAASQTLTSGKMPSGSKPSGTAKSGSKPSGSAPSGTATNSSSTSGETYK 420  
CECT749 PYKATSNEGPSGAASQTLTSGKMPSGSKPSGTAKSGSKPSGSAPSGTATNSSSTSGETYK 420  
NC8 PYKATSNEGPSGAASQTLTSGKMPSGSKPSGTAKSGSKPSGSAPSGTATNSSSTSGETYK 420  
\*\*\*\*\*

ATCC14917 TATAYIKALNKGKWIITYNAKNTATITSVKAFVKHCKTASKDVGFADGLTRQQTENKLF 480  
RM35 TATAYIKALNKGKWIITYNAKNTATITSVKAFVKHCKTASKDVGFADGLTRQQTENKLF 480  
CECT749 TATAYIKALNKGKWIITYNAKNTATITSVKAFVKHCKTASKDVGFADGLTRQQTENKLF 480  
NC8 TATAYIKALNKGKWIITYNAKNTATITSVKAFVKHCKTASKDVGFADGLTRQQTENKLF 480  
\*\*\*\*\*

ATCC14917 ATNGSSANHFDAITISKLLTTNQSKYAKLKNYKASYAKAYRSDLKKTDAQGSSIQKRMNLY 540  
RM35 ATNGSSANHFDAITISKLLTTNQSKYAKLKNYKASYAKAYRSDLKKTDAQGSSIQKRMNLY 540  
CECT749 ATNGSSANHFDAITISKLLTTNQSKYAKLKNYKASYAKAYRSDLKKTDAQGSSIQKRMNLY 540  
NC8 ATNGSSANHFDAITISKLLTTNQSKYAKLKNYKASYAKAYRSDLKKTDAQEVRFRSGT--- 537  
\*\*\*\*\* : : .

ATCC14917 NPLYYLTSYYDGYNTSKVAKYWRIRTGINQSDTALTIVETNLALTLKQNSQVKSVDVFATVW 600  
RM35 NPLYYLTSYYDGYNTSKVAKYWRIRTGINQSDTALTIVETNLALTLKQNSQVKSVDVFATVW 600  
CECT749 NPLYYLTSYYDGYNTSKVAKYWRIRTGINQSDTALTIVETNLALTLKQNSQVKSVDVFATVW 600  
NC8 ----YITHYIIPVIMTVITRARPSTGGFGR-----VSIRVILRLLRPHRINKIHKLVF 587  
\* : \* \* : : : \* : : \* . : \* \* : : : . \* :

ATCC14917 GQGHTEAERKGNNETNFIKWNKSLK 626  
RM35 GQGHTEAERKGNNETNFIKWNKSLK 626  
CECT749 GQGHTEAERKGNNETNFIKWNKSLK 626  
NC8 -----

Figure S3

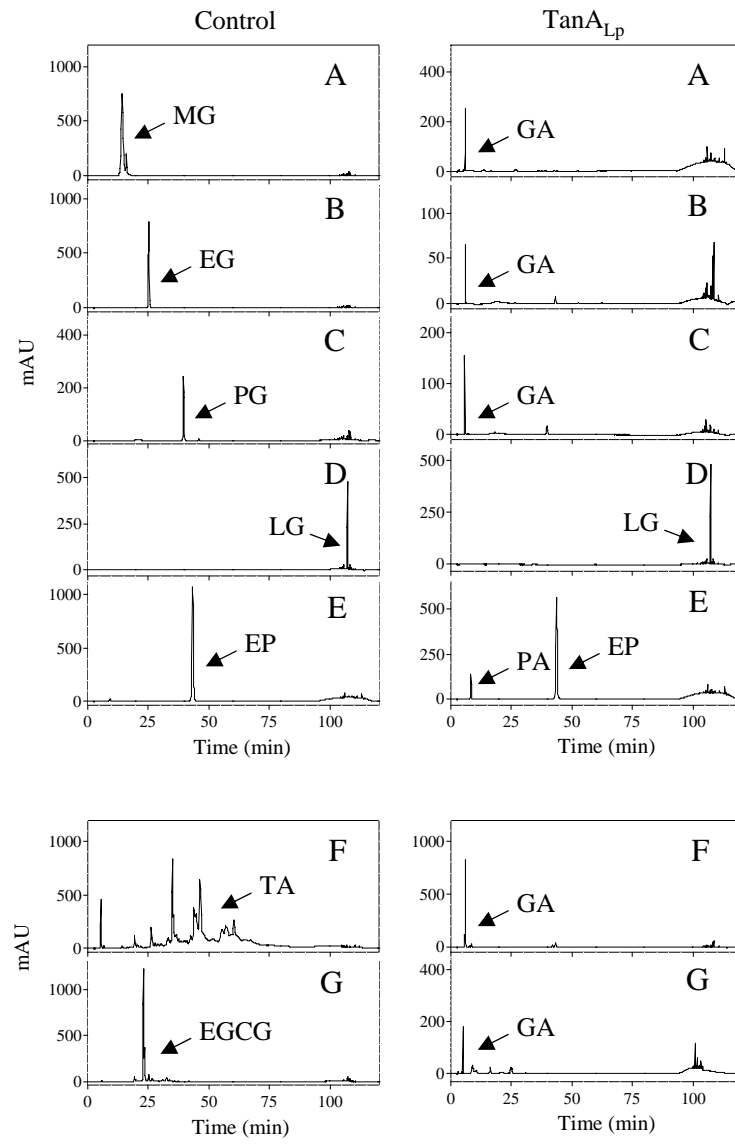

## Figure legends for supplementary material

**FIG S1.** Comparison of amino acid sequences of bacterial tannases. TanA<sub>SI</sub> from *Staphylococcus lugdunensis*, and TanA<sub>Lp</sub> and TanB<sub>Lp</sub> from *Lactobacillus plantarum*. Multiple alignments were done using the program ClustalW2 after retrieval of sequences from BLAST homology searches. Alignment of TanA<sub>SI</sub>-TanB<sub>Lp</sub> (A), TanA<sub>SI</sub>-TanA<sub>Lp</sub> (B), and TanA<sub>SI</sub>-TanB<sub>Lp</sub>-TanA<sub>Lp</sub> (C). Residues that are identical (\*), conserved (:), or semiconserved (.) in all sequences are indicated. Dashes indicated gaps introduced to maximize similarities. The serine hydrolase conserved motif is highlighted in yellow; residues of the catalytic triad identified in the structure of TanB<sub>Lp</sub> are highlighted in blue; and residues which make contacts with the three hydroxyl groups of gallic acid are highlighted in pink color.

**FIG S2.** Comparison of amino acid sequences of TanB<sub>Lp</sub> proteins from different *L. plantarum* strains. Residues that are identical (\*), conserved (:), or semiconserved (.) in all sequences are indicated. Dashes indicated gaps introduced to maximize similarities. The amino acid changes in relation to *L. plantarum* ATCC 14971<sup>T</sup> TanB<sub>Lp</sub> sequence are highlighted in colour.

**FIG S3.** Enzymatic activity of *L. plantarum* TanA<sub>Lp</sub> protein. Esterase activity of purified TanA<sub>Lp</sub> protein compared with control reactions on which the enzyme was omitted. HPLC chromatograms of TanA<sub>Lp</sub> (50 µg) incubated in 50 mM phosphate buffer pH 6, 1mM CaCl<sub>2</sub>, and 1 mM of methyl gallate (A), ethyl gallate (B), propyl gallate (C), lauryl gallate (D), ethyl protocatechuate (E), tannic acid (F), and epigallocatechin gallate (G). The methyl gallate (MG), ethyl gallate (EG), propyl gallate

(PG), lauryl gallate (LG), ethyl protocatechuate (EP), tannic acid (TA), epigallocatechin gallate (EGCG), gallic acid (GA), and protocatechuic acid (PA) detected are indicated.

The chromatograms were recorded at 280 nm.
